# Supplementary material for: Chronic social stress in pigs impairs intestinal barrier and nutrient transporter function, and alters neuro-immune mediator and receptor expression
Source: PubMed Central journal article supplement (PMC5295718; doi:10.1371/journal.pone.0171617), 2017-02-07
Supplement: pone.0171617.s001.pdf [file pone.0171617.s001.pdf]

S1 Table.

| Gene symbol  |         | Sequence                |
|--------------|---------|-------------------------|
| <i>ACTB</i>  | Forward | GAAGCTCAGTCGGGCTTCTC    |
|              | Reverse | ATGTCGACGTCGCACTTCAT    |
| <i>RPL4</i>  | Forward | AGCGAATGAGAGCTGGTAAAG   |
|              | Reverse | TTACGCCAAGTGCCATAGAG    |
| <i>MCT7</i>  | Forward | CTGAGATGCCTCGACCAATAC   |
|              | Reverse | TCCGTTGACCTCGTCATAGTA   |
| <i>CAMI</i>  | Forward | TTCACCCGGATCTCCCATGA    |
|              | Reverse | GAGACACACACTCGGTCTGG    |
| <i>IFNG</i>  | Forward | CCAGGCCATTCAAAGGAGCAT   |
|              | Reverse | TCAGTTTCCCAGAGCTACCA    |
| <i>TNFA</i>  | Forward | TGGGCTGTACCTCATCTACT    |
|              | Reverse | CACTGAGTCGATCATCCTTCTC  |
| <i>IL1B1</i> | Forward | GAAAGCCCAATTCAGGGACC    |
|              | Reverse | GGCGGGTTCAGGTA CTATGG   |
| <i>IL6</i>   | Forward | TAAGGGAAATGTCGAGGCCG    |
|              | Reverse | TTGTGTTCTTCATCCACTCGT   |
| <i>IL8</i>   | Forward | GACCCCAAGGAAAAGTGGGT    |
|              | Reverse | GAGGCAAGAAGACTTGTGAATGC |
| <i>IL10</i>  | Forward | TCGGCCCAGTGAAGAGTTTC    |
|              | Reverse | GGAGTTCACGTGCTCCTTGA    |
| <i>CRH</i>   | Forward | CCCATCTCGCTGGATCTCAC    |
|              | Reverse | CCAAACGCACCGTTTCACTT    |
| <i>Ucn2</i>  | Forward | GTCACTGCCATGTGGTGTCA    |

|              |              |                       |
|--------------|--------------|-----------------------|
|              | Reverse      | GACATGGCAACATCCAGGCT  |
| <i>CRHR2</i> | Forward      | CCGCAATGCCTACCGAGAAT  |
|              | Reverse      | TCATCCAAAATGGGCTCGCA  |
| <i>CRHBP</i> | Forward      | GCTGGGAGGAACTGGATTGG  |
|              | Reverse      | CTGGCGGTACTCAAAAGTCAC |
| <i>SGLT1</i> | Forward      | GTGCAGTCAGCACAAAGTGG  |
|              | Reverse      | GTTCACTACTGTCCGCCACA  |
| <i>GLUT2</i> | Forward      | TTTTGGGTGTTCCGCTGGAT  |
|              | Reverse      | GAGGCTAGCAGATGCCGTAG  |
| <i>ACTB</i>  | TaqMan probe | Ss03376563_uH         |
| <i>GLUT5</i> | TaqMan probe | Ss03377332_u1         |
| <i>BOAT1</i> | TaqMan probe | Ss03376931_u1         |
| <i>ATB0+</i> | TaqMan probe | Ss03376400_u1         |
| <i>EAAT3</i> | TaqMan probe | Ss03373659_m1         |
| <i>CRHR1</i> | TaqMan probe | Ss03373288_g1         |

---
